# Supplementary material
Source: PubMed Central journal article supplement (PMC4171035)
Supplement: Supp_Table1.pdf [file Supp_Table1.pdf]

## Supplementary Data

SUPPLEMENTARY TABLE 1. BRAIN METRICS FOR ABUSIVE HEAD TRAUMA CASES VERSUS COMPARISON COHORT (N=51)

|                                              | <i>Case (n=17)</i> | <i>C-Cohort (n=34)</i> |
|----------------------------------------------|--------------------|------------------------|
| Post-conceptual age (weeks), mean (SD)       | 76.53 (22.34)      | 75.63 (17.10)          |
| <b>PARENCHYMAL (mm)</b>                      |                    |                        |
| Frontal lobe height left, mean (SD)          | 50.60 (10.03)      | 52.08 (7.40)           |
| Frontal lobe height right, mean (SD)         | 51.99 (10.23)      | 52.22 (7.85)           |
| Transverse cerebellar diameter, mean (SD)    | 76.49 (10.15)      | 78.17 (9.23)           |
| Fronto-occipital diameter, mean (SD)         | 121.74 (12.3)      | 123.22 (9.67)          |
| Bifrontal diameter, mean (SD)                | 74.52 (10.45)      | 77.45 (8.17)           |
| Biparietal diameter brain, mean (SD)         | 99.00 (10.34)      | 101.01 (9.62)          |
| Corpus callosum length, mean (SD)            | 46.33 (7.07)       | 46.24 (6.95)           |
| <b>VENTRICULAR (mm)</b>                      |                    |                        |
| Third ventricle, mean (SD)                   | 4.66 (1.26)        | 4.86 (1.68)            |
| Lateral ventricle, right mean (SD)           | 9.53 (1.79)        | 9.25 (1.86)            |
| Lateral ventricle left, mean (SD)            | 10.00 (2.31)       | 10.15 (2.25)           |
| <b>EXTRA-AXIAL (mm)</b>                      |                    |                        |
| Biparietal diameter bone, mean (SD)          | 108.61 (9.49)      | 107.55 (9.14)          |
| Craniocaudal intraopercular right, mean (SD) | 4.42 (2.11)        | 4.03 (2.21)            |
| Craniocaudal intraopercular left, mean (SD)  | 5.34 (2.68)        | 3.97 (1.58)            |
| Interhemispheric distance, mean (SD)         | 6.15 (1.93)        | 5.09 (1.81)            |

C-Cohort, Comparison Cohort; SD, standard deviation.

\*By Fisher exact test.
