# Supplementary material
Source: PubMed Central journal article supplement (PMC4171035)
Supplement: Supp_Table2.pdf [file Supp_Table2.pdf]

SUPPLEMENTARY TABLE 2. BRAIN METRICS IN ABUSIVE HEAD TRAUMA CASES: COMPARISON BETWEEN OUTCOME GROUPS (N=17)

|                                              | <i>Mild/Mod</i> (n=9) | <i>Severe</i> (n=8) | <i>p* value</i> |
|----------------------------------------------|-----------------------|---------------------|-----------------|
| Post-conceptual age in weeks, mean (SD)      | 77.33 (23.20)         | 75.70 (23.04)       | 0.89            |
| <b>PARENCHYMAL (mm)</b>                      |                       |                     |                 |
| Frontal lobe height left, mean (SD)          | 51.53 (10.40)         | 49.47 (10.19)       | 0.63            |
| Frontal lobe height right, mean (SD)         | 52.79 (10.21)         | 51.08 (10.88)       | 0.63            |
| Transverse cerebellar diameter, mean (SD)    | 74.15 (11.68)         | 79.13 (8.04)        | 0.50            |
| Fronto-occipital diameter, mean (SD)         | 121.31 (12.78)        | 122.23 (12.59)      | 0.92            |
| Bifrontal diameter, mean (SD)                | 72.30 (10.11)         | 77.02 (10.92)       | 0.21            |
| Biparietal diameter brain, mean (SD)         | 96.87 (10.66)         | 101.40 (10.09)      | 0.44            |
| Corpus callosum length, mean (SD)            | 44.83 (6.75)          | 48.01 (7.49)        | 0.34            |
| <b>VENTRICULAR (mm)</b>                      |                       |                     |                 |
| Third ventricle, mean (SD)                   | 4.39 (1.47)           | 4.95 (0.98)         | 0.39            |
| Lateral ventricle right, mean (SD)           | 9.31 (1.88)           | 9.78 (1.78)         | 0.85            |
| Lateral ventricle left, mean (SD)            | 9.81 (2.09)           | 10.21 (2.66)        | 1.00            |
| <b>EXTRA-AXIAL (mm)</b>                      |                       |                     |                 |
| Biparietal diameter bone, mean (SD)          | 107.19 (9.73)         | 110.21 (9.60)       | 0.63            |
| Craniocaudal intraopercular right, mean (SD) | 3.86 (1.70)           | 5.05 (2.46)         | 0.56            |
| Craniocaudal intraopercular left, mean (SD)  | 4.77 (2.71)           | 5.97 (2.68)         | 0.25            |
| Interhemispheric distance, Mean (SD)         | 6.20 (1.88)           | 6.09 (2.11)         | 0.77            |

Mod, moderate; SD, standard deviation.

\*By Mann-Whitney *U* test.
